# Supplementary material for: Single-electron operations in a foundry-fabricated array of quantum dots
Source: PubMed Central journal article supplement (PMC7744547; doi:10.1038/s41467-020-20280-3), 2020-12-16
Supplement: 41467_2020_20280_MOESM1_ESM.pdf [file 41467_2020_20280_MOESM1_ESM.pdf]

# Supplementary Information for "Single-electron operations in a foundry-fabricated array of quantum dots"

Fabio Ansaloni<sup>†,1</sup>, Anasua Chatterjee<sup>†,1</sup>, Heorhii Bohuslavskiy<sup>1</sup>,  
Benoit Bertrand,<sup>2</sup> Louis Hutin,<sup>2</sup> Maud Vinet,<sup>2</sup> and Ferdinand Kuemmeth<sup>1,3</sup>

<sup>1</sup>Center for Quantum Devices, Niels Bohr Institute,  
University of Copenhagen, 2100 Copenhagen, Denmark

<sup>2</sup>CEA, LETI, Minatec Campus, Grenoble, France

<sup>3</sup>kuemmeth@nbi.dk

<sup>†</sup>These authors contributed equally to this work.

(Dated: December 4, 2020)

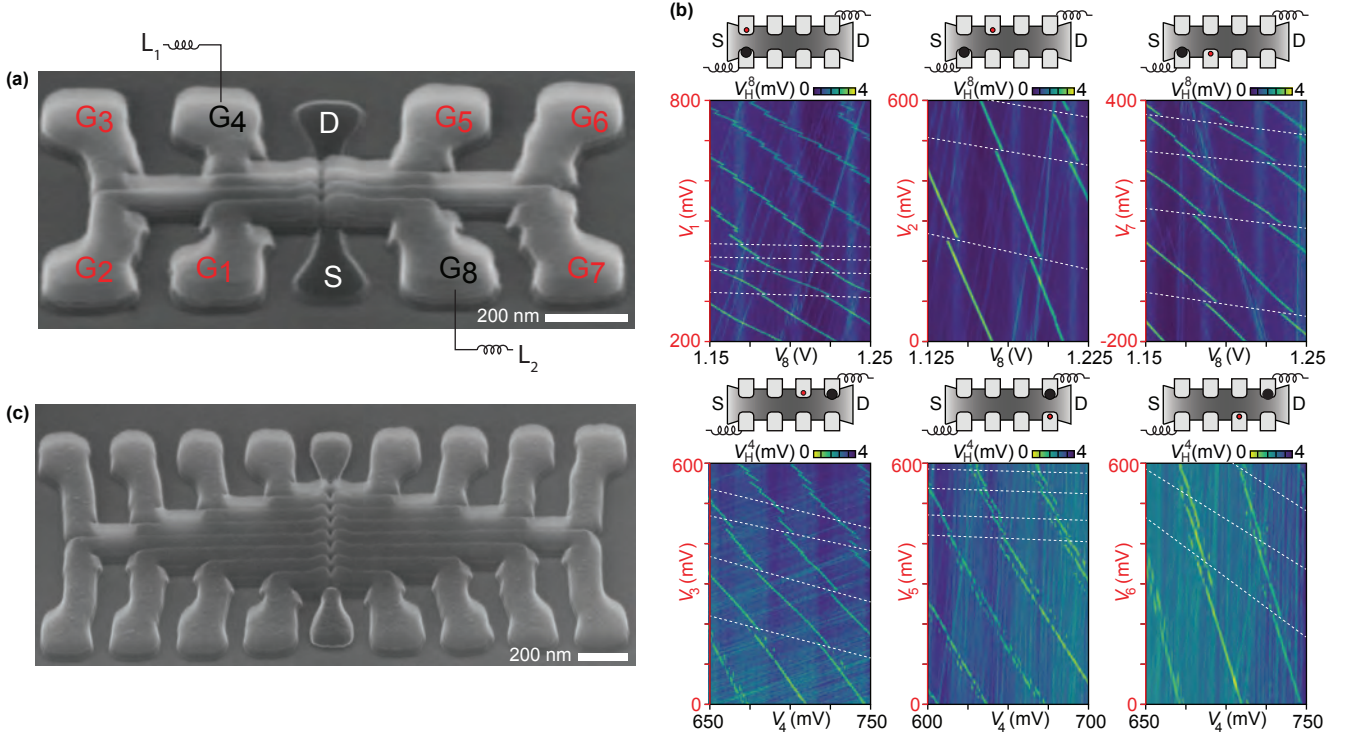

FIG. S1: **2xN quantum-dot arrays.** (a) Tilted scanning-electron micrograph of a 2x4 quantum-dot array. Ohmic contacts appear dark grey and are used as electron reservoirs. Polysilicon electrodes appear light grey and are used to control the chemical potential of each quantum dot. Gates  $G_4$  and  $G_8$  are embedded in high-frequency reflectometry circuits to perform gate-based dispersive readout, analogously to Figure 1b,d, resulting in homodyne-detected voltages  $V_H^4$  and  $V_H^8$ , respectively. (b) Detection of the first electron for each of the quantum dots in the array. A multi-electron quantum dot formed underneath  $G_8$  is used as a sensor to investigate the left side of quantum dot array (top graphs), whereas the right side is investigated using  $G_4$  as sensor dot (bottom graphs). In the insets, red and black dots denote one- and multi-electron occupation, respectively. (c) Tilted scanning-electron micrograph of a 2x8 quantum-dot array.

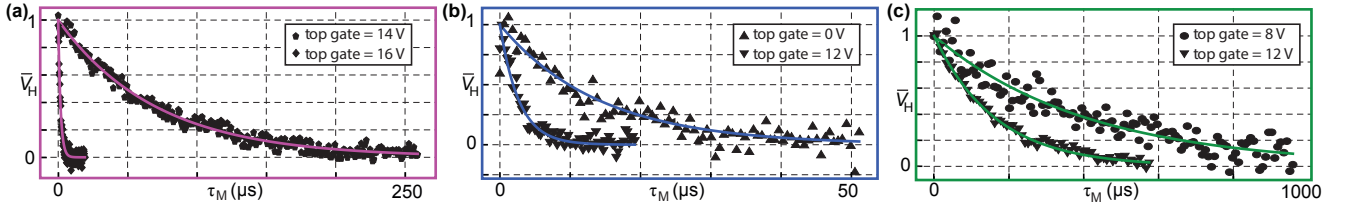

FIG. S2: **Sensor signal and fitted tunneling times for the other transitions in Figure 3a.** (a)-(c) An exponential decay is fitted to the normalized  $\bar{V}_H$  data for different values of the top-gate voltage, analogous to the interdot transition described in Figure 3c. Fitted  $1/e$  times are plotted in Figure 3d. Colors correspond to the transitions indicated in Figure 3a.

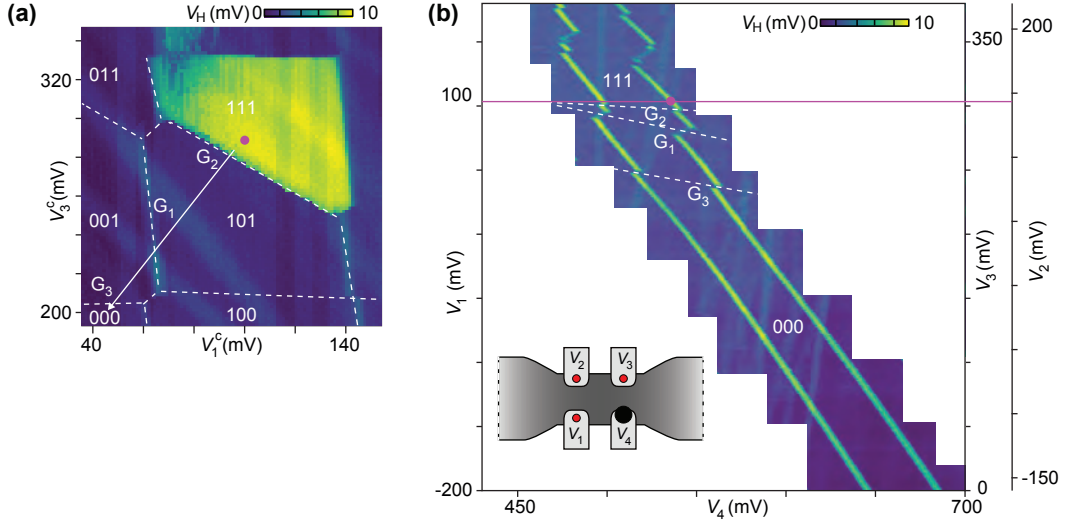

FIG. S3: **Verifying electron count in the 111 configuration.** (a) Putative 111 ground-state region (yellow area) appearing in a compensated 2D map ( $V_1^c$  vs  $V_3^c$ ) similar to the maps in Figure 2. The qubit array, initialized at the magenta dot, can be depleted of electrons by reducing simultaneously  $V_1^c$  and  $V_3^c$  (white arrow), in this example removing one electron from dot 2, then one from dot 1, and finally one from dot 3 (ground-state transitions are marked by  $G_2$ ,  $G_1$ ,  $G_3$ ). However, these charge transitions are not visible in the sensor signal  $V_H$ , as dot 4 is in Coulomb blockade (blue regions), thereby neither confirming nor disputing the absolute occupation numbers. (b) However, by reducing  $V_1$ ,  $V_2$ ,  $V_3$  simultaneously (note the three vertical axes) while sweeping  $V_4$ , each charge transition within the qubit array induces a capacitive shift of the dot-4 Coulomb peak (magenta dot), confirming the presence of exactly three electrons in the 111 configuration. Moreover, comparison with another dot-4 Coulomb peak reveals three distinct slopes (marked  $G_2$ ,  $G_1$ ,  $G_3$ ), confirming that each charge transition indeed corresponds to a different dot. Note the absence of charge transitions for lower or even negative gate voltages applied to  $V_1$ ,  $V_2$ , and  $V_3$ .

| $V_1$ (mV)              | $V_2$ (mV) | $V_3$ (mV) | $V_4$ (mV) | $V_{tg}$ (mV) |
|-------------------------|------------|------------|------------|---------------|
| dot2-to-lead transition |            |            |            |               |
| 0                       | 131        | 112        | 606        | 8000          |
| 0                       | 91         | 98         | 500        | 10000         |
| 0                       | 51         | 53         | 510        | 12000         |
| dot3-to-lead transition |            |            |            |               |
| 0                       | 195        | 251        | 615        | 0             |
| 0                       | 135        | 204        | 633        | 2000          |
| 0                       | 65         | 166        | 635        | 4000          |
| 0                       | 40         | 144        | 615        | 6000          |
| 0                       | 35         | 102        | 626        | 8000          |
| 0                       | 5          | 83         | 565        | 10000         |
| 0                       | -30        | 62         | 500        | 12000         |
| dot1-to-dot2 transition |            |            |            |               |
| 98                      | 210        | 0          | 480        | 6000          |
| 63                      | 148        | 0          | 438        | 8000          |
| 17                      | 122        | 0          | 541        | 10000         |
| dot2-to-dot3 transition |            |            |            |               |
| 0                       | 100        | 113        | 551        | 10000         |
| 0                       | 51         | 107        | 343        | 14000         |
| 0                       | -1         | 66         | 306        | 16000         |

TABLE S1: **Gate voltages associated with Figure 3d.** Each data point in Figure 3d shows the observed tunneling time associated with a specific charge transition, specified by the color code in Figure 3a. The gate voltages associated with each charge transition are listed here. For each transition, the side-gate voltages needed to be decreased somewhat when increasing the top-gate voltage ( $V_{tg}$ ), due to capacitive cross coupling between gate electrodes and quantum dots.

| cool down |       | observed 0-1 threshold<br>$V_1, V_2, V_3, V_4, V_{tg}$ (mV) | extrapolated 0-1 threshold<br>$V_1, V_2, V_3, V_4, V_{tg}$ (mV) |
|-----------|-------|-------------------------------------------------------------|-----------------------------------------------------------------|
| A         | dot-1 | <b>44</b> , 80, 150, 491, 12000                             | <b>292</b> , 0, 0, 0, 10000                                     |
|           | dot-2 | 80, <b>40</b> , 150, 489, 12000                             | 0, <b>248</b> , 0, 0, 10000                                     |
|           | dot-3 | 80, 100, <b>95</b> , 489, 12000                             | 0, 0, <b>280</b> , 0, 10000                                     |
| B         | dot-1 | <b>65</b> , 134, 170, 510, 10000                            | <b>328</b> , 0, 0, 0, 10000                                     |
|           | dot-2 | 101, <b>85</b> , 170, 505, 10000                            | 0, <b>258</b> , 0, 0, 10000                                     |
|           | dot-3 | 101, 120, <b>133</b> , 519, 10000                           | 0, 0, <b>282</b> , 0, 10000                                     |
| C         | dot-1 | <b>60</b> , 111, 175, 508, 12000                            | <b>353</b> , 0, 0, 0, 10000                                     |
|           | dot-2 | 90, <b>67</b> , 175, 508, 12000                             | 0, <b>274</b> , 0, 0, 10000                                     |
|           | dot-3 | 90, 119, <b>132</b> , 510, 12000                            | 0, 0, <b>300</b> , 0, 10000                                     |

TABLE S2: **Threshold voltages for different gate electrodes and different cool downs.** Comparison between other cool downs of the same device as in Figure 2, listing gate voltages for which the 0-to-1 charge transition was observed for each qubit dot ("observed threshold"). Voltages associated with the strongest gate electrode for a given dot (cf. diagonal entries of  $\hat{C}$  in the main text) are printed in bold face. To facilitate comparison between different cool downs, as well as comparison between different gate electrodes within one cool down, we use lever arms associated with  $\hat{C}$  to extrapolate from the observed threshold a fictive threshold that corresponds to biasing a single gate electrode while keeping all other gate electrodes at zero (rightmost column). The spread of extrapolated threshold voltages for cool down A (B, C) is 44 (54, 47) mV, whereas the spread of extrapolated threshold voltages between different cool downs is 59 (26, 20) mV for gate 1 (2, 3). For each cool down, gate electrodes were grounded while cooling from room temperature to base temperature of the dilution refrigerator.
